# Supplementary material for: Chemical induces microstructural transformation of pulp fibre to colloidal cellulose for sustainable plant protection
Source: Royal Society of Chemistry journal article supplement (doi:10.1039/d4ra06600f), 2024-01-01
Supplement: d4ra06600f1.pdf [file d4ra06600f1.pdf]

## Electronic Supplementary Information (ESI)

Chemical Induces Microstructural Transformation of Pulp Fibre to Colloidal Cellulose for Sustainable Plant Protection

Apichat Phengdaam<sup>a\*</sup>, Jiranat Chaiyosburana<sup>b</sup>, Wichayut Hianchasri<sup>c</sup>, Nutthaphol Khupsathianwong<sup>d</sup>, Nattapon Uthaipan<sup>e</sup> and Sanong Ekgasit<sup>c\*</sup>

<sup>a</sup> Division of Physical Science, Faculty of Science, Prince of Songkla University, Hat Yai, Songkhla 90110, Thailand.

<sup>b</sup> NIST International School, Klongtoey-nua, Wattana, Bangkok 10110 Thailand.

<sup>c</sup> Sensor Research Unit, Department of Chemistry, Faculty of Science, Chulalongkorn University, Bangkok 10330, Thailand.

<sup>d</sup> Technopreneurship and Innovation Management Program, Graduate School, Chulalongkorn University, Bangkok 10330, Thailand

<sup>e</sup> Rubber Engineering and Technology Program, Department of Specialized Engineering, Faculty of Engineering, Prince of Songkla University, Hat Yai, Songkhla 90110, Thailand

\*Corresponding author: [apichat.p@psu.ac.th](mailto:apichat.p@psu.ac.th) and [sanong.e@chula.ac.th](mailto:sanong.e@chula.ac.th)

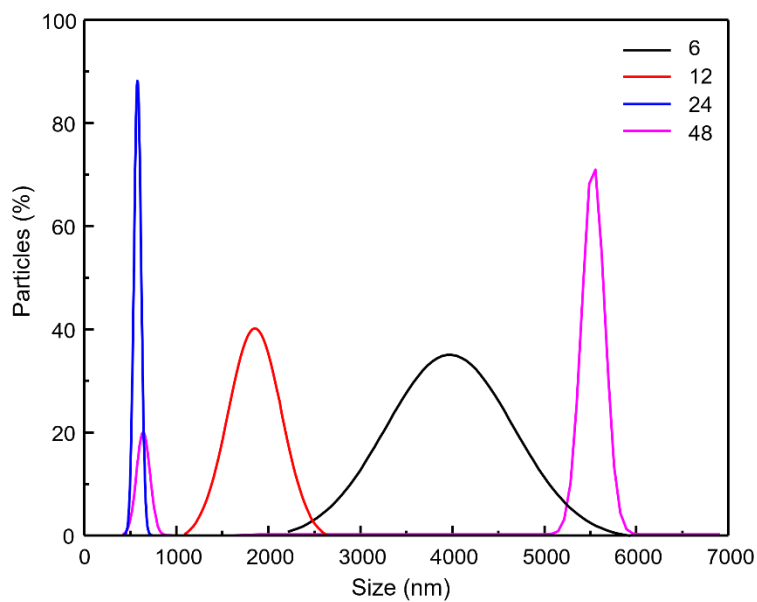

**Fig S1** The particle size distribution of colloidal cellulose, subjected to varying acidic treatment durations of 6, 12, 24, and 48 hours, was determined using DLS analysis.

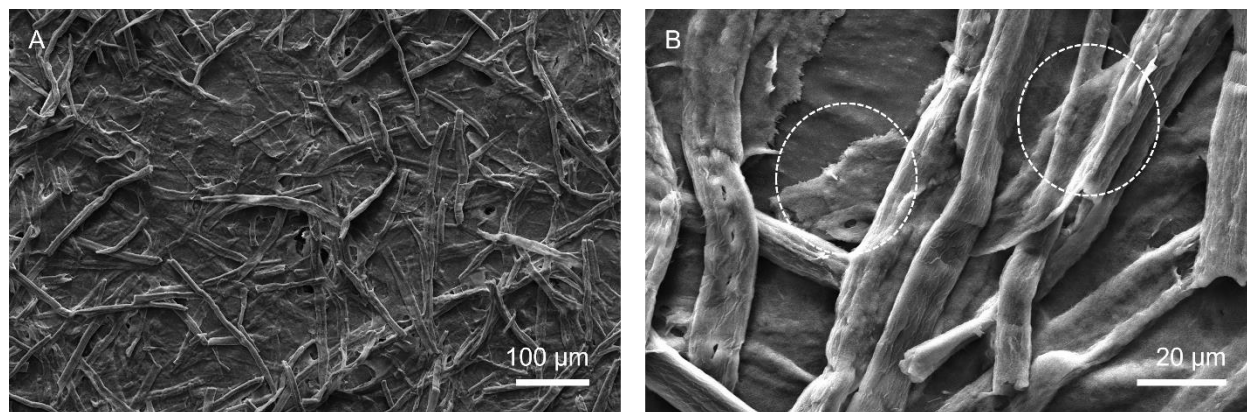

**Fig S2** FE-SEM images illustrating the pulp fibre structure following 48 hours of acidic treatment at magnifications of 500x (A) and 3000x (B). The dashed circle highlights the accumulated particles.

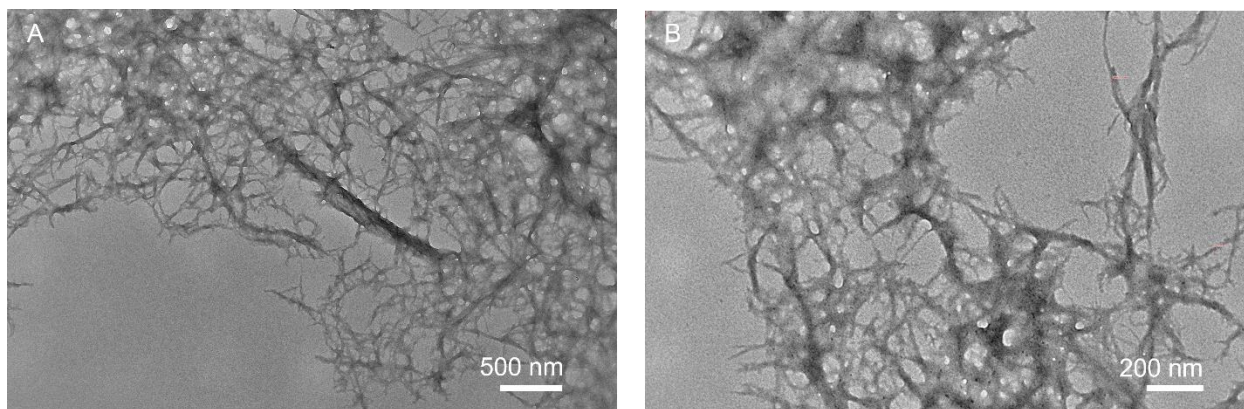

**Fig S3** TEM images depicting the pulp fibre structure after 24 hours of acidic treatment at magnifications of 10,000x (A) and 20,000x (B).

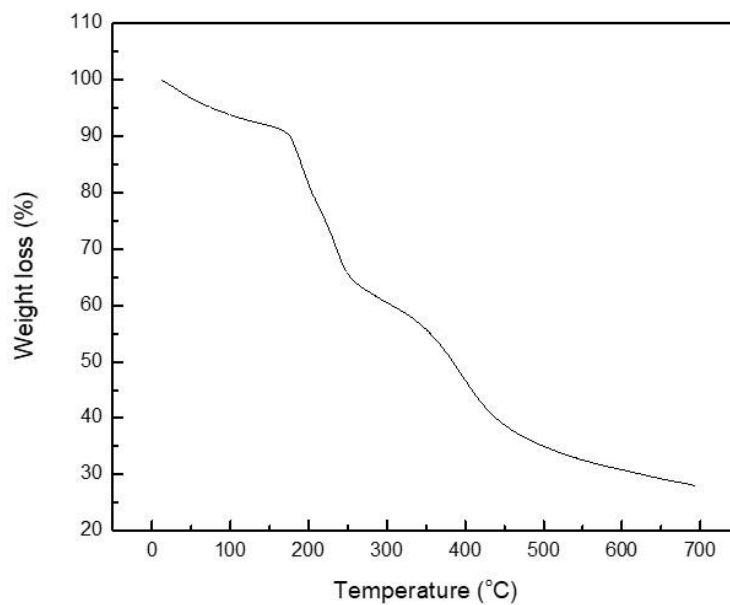

**Fig S4** TGA profile of the cellulose film, illustrating its thermal stability and decomposition behavior.
